# Supplementary material
Source: PubMed Central journal article supplement (PMC5669634)
Supplement: supp_jlb.4A0517-179R_Supplemental_Figure1.pdf [file supp_jlb.4A0517-179R_Supplemental_Figure1.pdf]

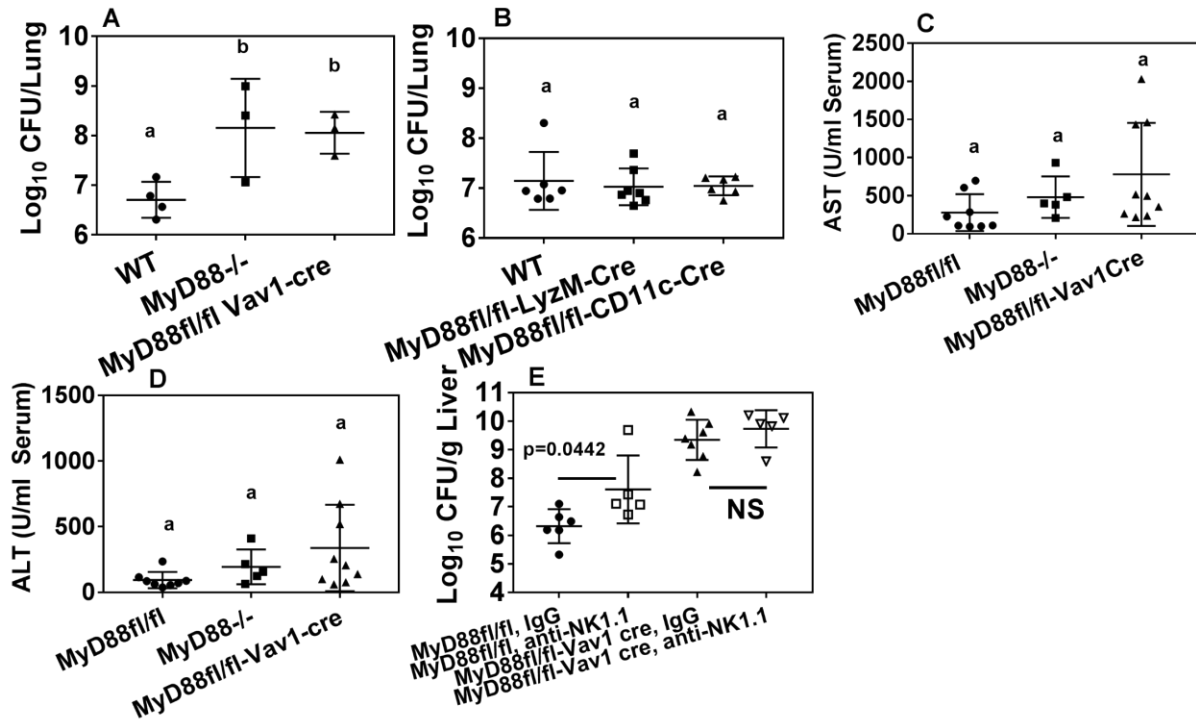

**Figure S1.** **A-B)** Wild-type (WT), MyD88<sup>fl/fl</sup> (control), MyD88<sup>-/-</sup> and conditional MyD88 deficient mice (3-7 group) were infected i.t. with 75 CFUs of *F. tularensis* SchuS4 and lung bacterial burdens were measured 4 days post-infection. Groups with the same letter are not significantly different from each other as determined via ANOVA followed by Tukey's test ( $p < 0.05$ ). **C-D)** Serum AST and ALT levels were measured from MyD88<sup>fl/fl</sup> (control), MyD88<sup>-/-</sup> and MyD88<sup>fl/fl</sup> Vav1-cre mice (5-9/group) four days after s.c. infection with 75 CFUs of *F. tularensis* SchuS4. Means with the same letter are not significantly different from each other as determined via ANOVA followed by Tukey's test ( $p < 0.05$ ). **E)** MyD88<sup>fl/fl</sup> (control) and MyD88<sup>fl/fl</sup> Vav1-cre mice (5-6/group) were depleted of NK cells (anti-NK1.1) or treated with IgG as a control. Liver bacterial burdens were measured four days after s.c. infection with 75 CFUs of *F. tularensis* SchuS4. All error bars depict SD.
